# Supplementary material for: Was motiviert Schülerinnen und Schüler für das Lehramt?
Source: Atypon-hosted journal article supplement (doi:10.1024/1010-0652/a000338), 2022-01-19
Supplement: 1010-0652_a000338_esm1.pdf [file 1010-0652_a000338_esm1.pdf]

## Elektronisches Supplement 1

Tabelle 1. Vergleich verschiedener Faktorenmodelle in Studie 1-3

| Modell   | df / $\chi^2$ -Wert | CFI  | TLI  | RMSEA | SRMR | AIC     | BIC     | <i>p</i> aus $\chi^2$ -Diff.test<br>(Vergleich mit<br>Modell 1) |
|----------|---------------------|------|------|-------|------|---------|---------|-----------------------------------------------------------------|
| Studie 1 |                     |      |      |       |      |         |         |                                                                 |
| 1        | 84/150.8***         | .956 | .945 | .061  | .065 | 8046.5  | 8218.0  | ---                                                             |
| 2        | 80/124.0**          | .971 | .962 | .051  | .040 | 8027.8  | 8212.7  | <i>p</i> < .001, besser                                         |
| 3        | 89/632.2***         | .641 | .576 | .169  | .153 | 8517.9  | 8672.6  | <i>p</i> < .001, schlechter                                     |
| 4        | 90/857.9***         | .492 | .408 | .200  | .157 | 8741.6  | 8892.9  | <i>p</i> < .001, schlechter                                     |
| Studie 2 |                     |      |      |       |      |         |         |                                                                 |
| 1        | 84/113.9*           | .982 | .977 | .036  | .042 | 10793.4 | 10978.4 | ---                                                             |
| 2        | 80/107.3*           | .983 | .978 | .035  | .037 | 10794.8 | 10994.3 | <i>p</i> = .159                                                 |
| 3        | 89/540.3***         | .723 | .674 | .135  | .100 | 11209.9 | 11376.7 | <i>p</i> < .001, schlechter                                     |
| 4        | 90/963.1***         | .465 | .376 | .187  | .160 | 11630.6 | 11793.8 | <i>p</i> < .001, schlechter                                     |
| Studie 3 |                     |      |      |       |      |         |         |                                                                 |
| 1        | 84/140.6***         | .974 | .968 | .044  | .049 | 14348.4 | 14545.2 | ---                                                             |
| 2        | 80/106.3*           | .988 | .984 | .031  | .034 | 14322.2 | 14534.4 | <i>p</i> < .001, besser                                         |
| 3        | 89/679.8***         | .729 | .680 | .138  | .117 | 14877.7 | 15055.2 | <i>p</i> < .001, schlechter                                     |
| 4        | 90/1139.6***        | .519 | .438 | .183  | .121 | 15335.5 | 15509.1 | <i>p</i> < .001, schlechter                                     |

Benennung:

Modell 1: Fünf-Faktoren-Modell mit einem intrinsischen und einem extrinsischen Sekundärfaktor

Modell 2: Fünf-Faktoren-Modell ohne Sekundärfaktoren

Modell 3: Zwei-Faktoren-Modell, in dem die Items nur auf einen intrinsischen und einen extrinsischen Faktor laden

Modell 4: Ein-Faktoren-Modell
