# Supplementary material for: Was motiviert Schülerinnen und Schüler für das Lehramt?
Source: Atypon-hosted journal article supplement (doi:10.1024/1010-0652/a000338), 2022-01-19
Supplement: 1010-0652_a000338_esm3.pdf [file 1010-0652_a000338_esm3.pdf]

### Elektronisches Supplement 3

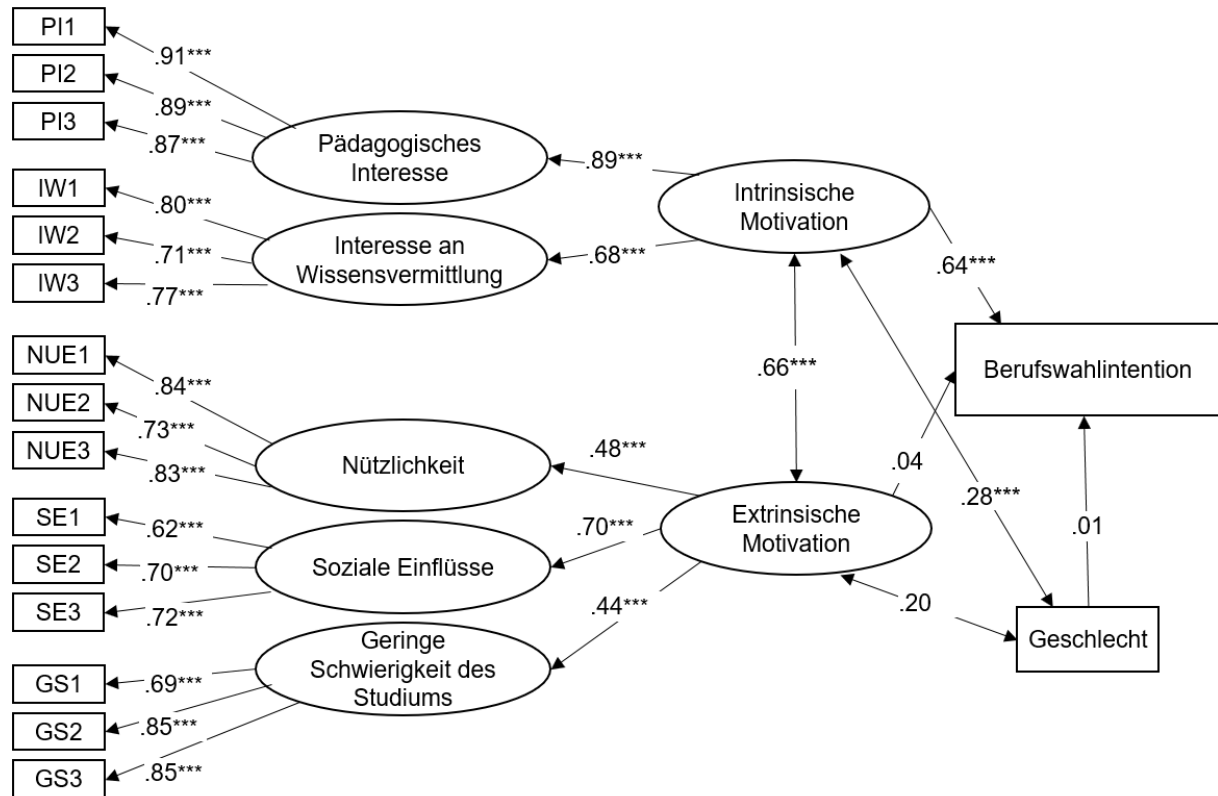

Abbildung 1. Strukturgleichungsmodell zur Vorhersage der Berufswahlintention durch intrinsische und extrinsische Berufswahlmotivationen in Studie 1. Angegeben sind Ladungen,  $\beta$ -Koeffizienten und Korrelationen.

\*\*\* $p < .001$

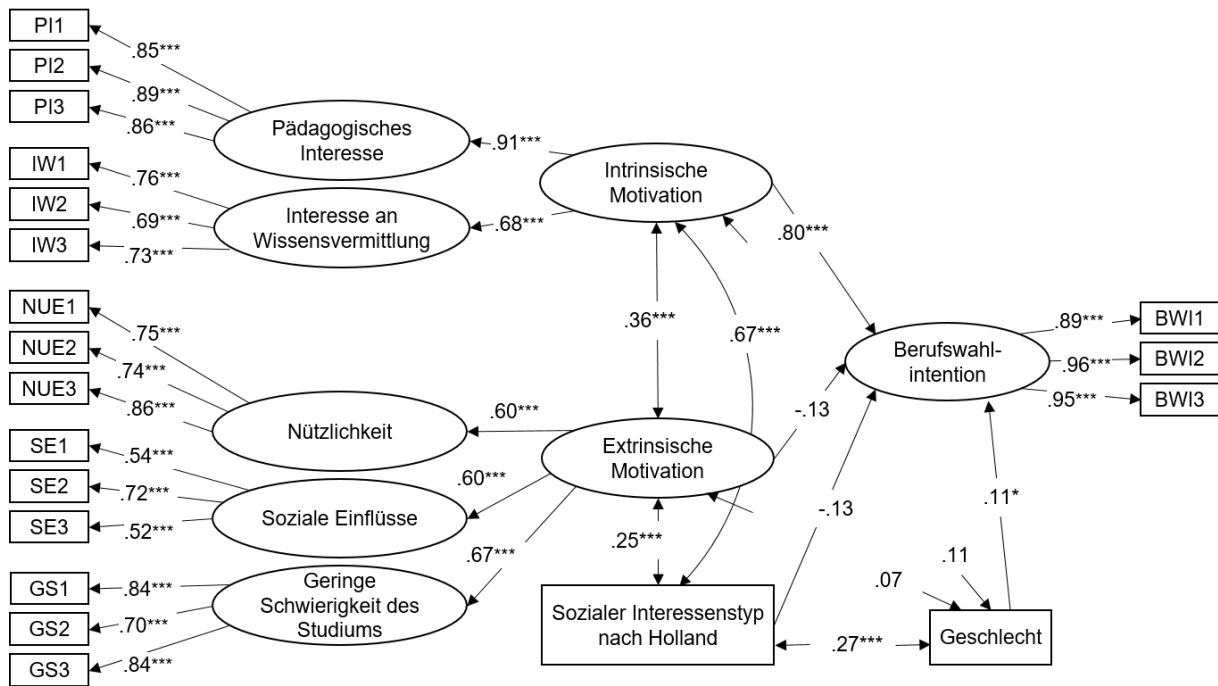

Abbildung 2. Strukturgleichungsmodell zur Vorhersage der Berufswahlintention durch intrinsische und extrinsische Berufswahlmotivationen unter Kontrolle des Geschlechts und des sozialen Interessentyps nach Holland in Studie 2. Angegeben sind Ladungen,  $\beta$ -Koeffizienten und Korrelationen.

\*\*\* $p < .001$ , \* $p < .05$

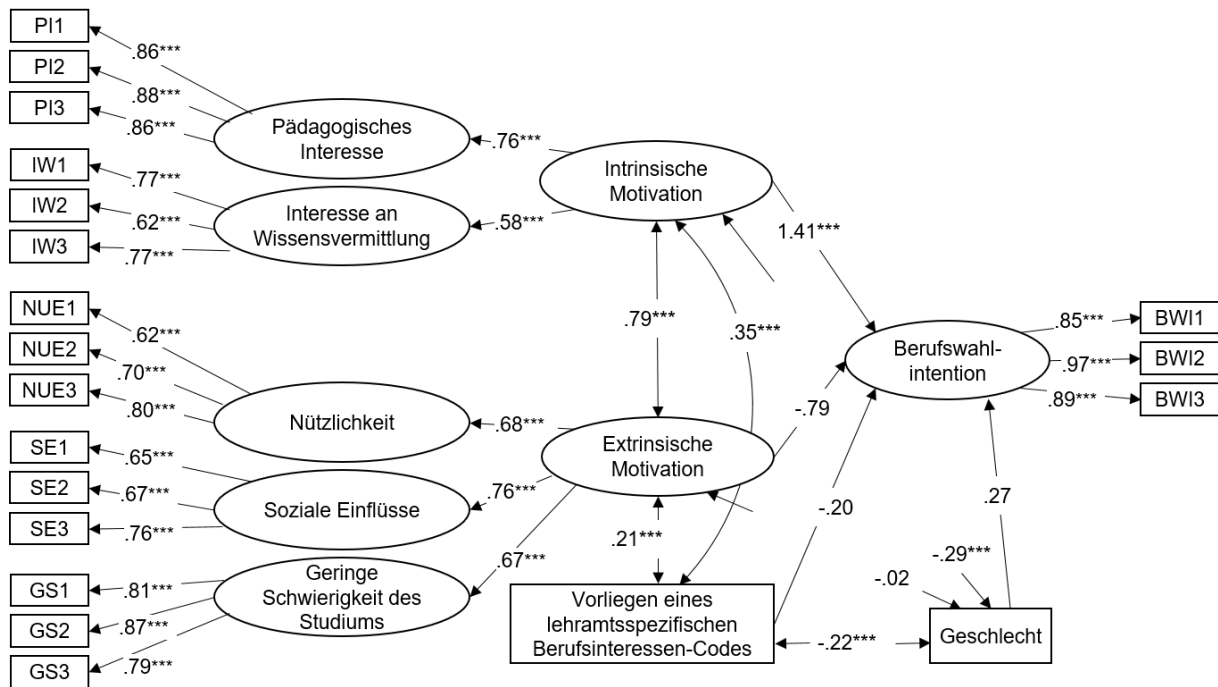

Abbildung 3. Strukturgleichungsmodell zur Vorhersage der Berufswahlintention durch intrinsische und extrinsische Berufswahlmotivationen unter Kontrolle des Geschlechts und des Vorliegens eines lehramtsspezifischen Berufsinteressen-Codes nach Holland in Studie 3. Angegeben sind Ladungen,  $\beta$ -Koeffizienten und Korrelationen. \*\*\* $p < .001$ , \* $p < .05$
