# Supplementary material for: Was motiviert Schülerinnen und Schüler für das Lehramt?
Source: Atypon-hosted journal article supplement (doi:10.1024/1010-0652/a000338), 2022-01-19
Supplement: 1010-0652_a000338_esm4.pdf [file 1010-0652_a000338_esm4.pdf]

## Elektronisches Supplement 4

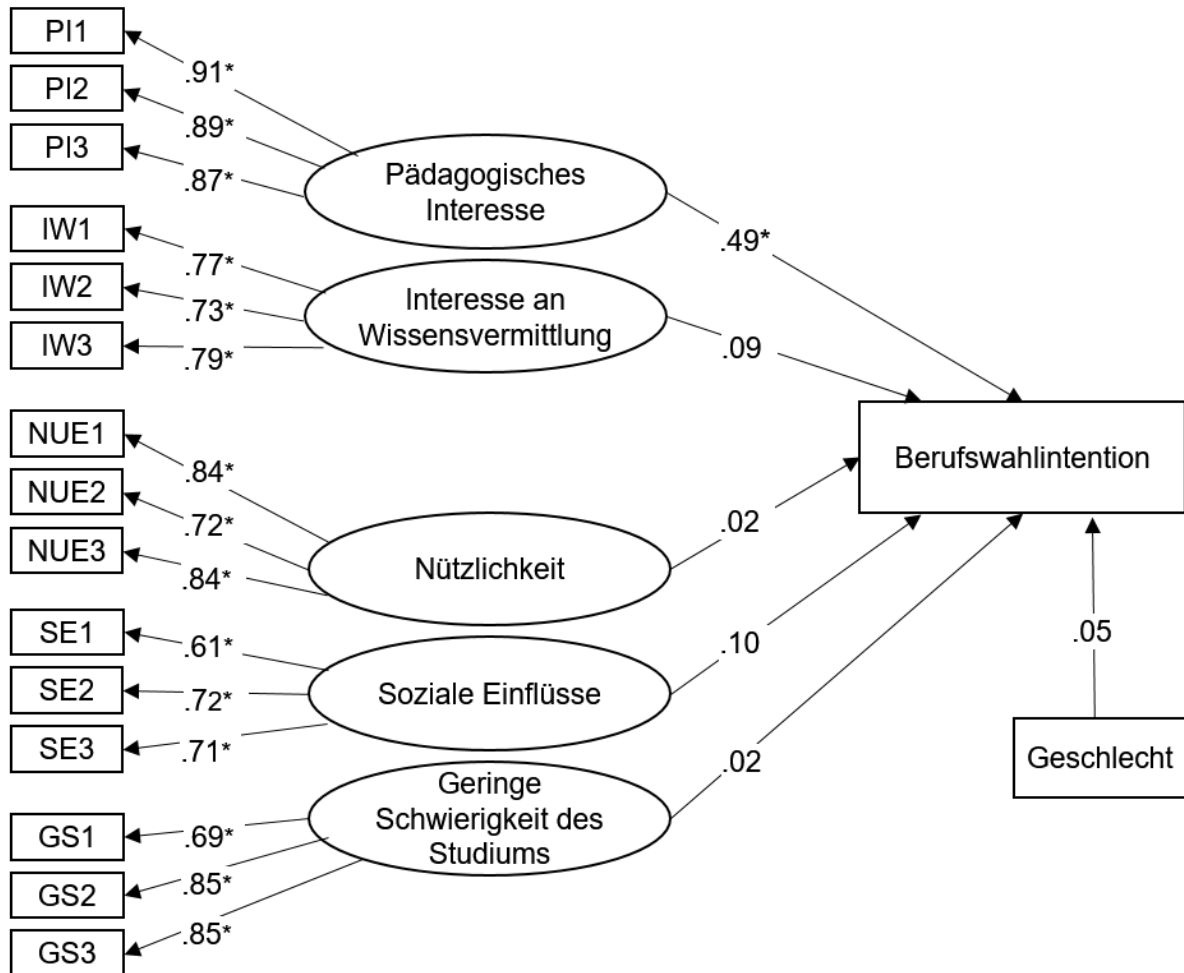

Abbildung 1. Strukturgleichungsmodell zur Vorhersage der Berufswahlintention durch die Skalen des FEMOLA-S in Studie 1 ( $\chi^2(100)=143.65$ ; CFI = .97; TLI = .96; RMSEA = .05; SRMR = .04).

Interkorrelationen der Prädiktoren sind aus Gründen der Übersichtlichkeit nicht abgebildet.

Angegeben sind Ladungen,  $\beta$ -Koeffizienten und Korrelationen.

\* $p < .05$

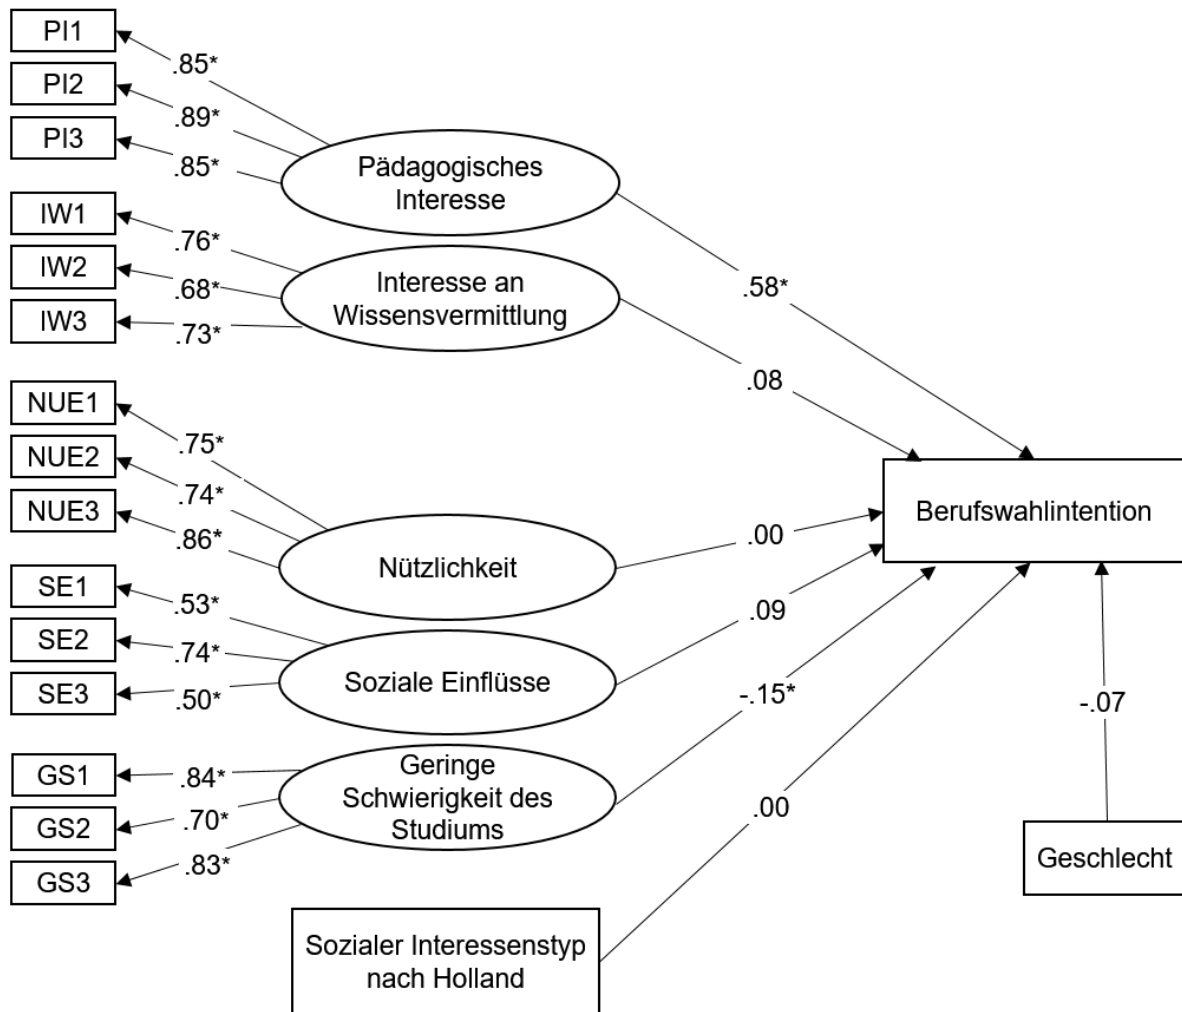

Abbildung 2. Strukturgleichungsmodell zur Vorhersage der Berufswahlintention durch die Skalen des FEMOLA-S unter Kontrolle des Geschlechts und des sozialen Interessentyps nach Holland in Studie 2 ( $\chi^2(144)=185.95$ ; CFI = .99; TLI = .98; RMSEA = .03; SRMR = .04). Interkorrelationen der Prädiktoren sind aus Gründen der Übersichtlichkeit nicht abgebildet. Angegeben sind Ladungen,  $\beta$ -Koeffizienten und Korrelationen. \* $p < .05$

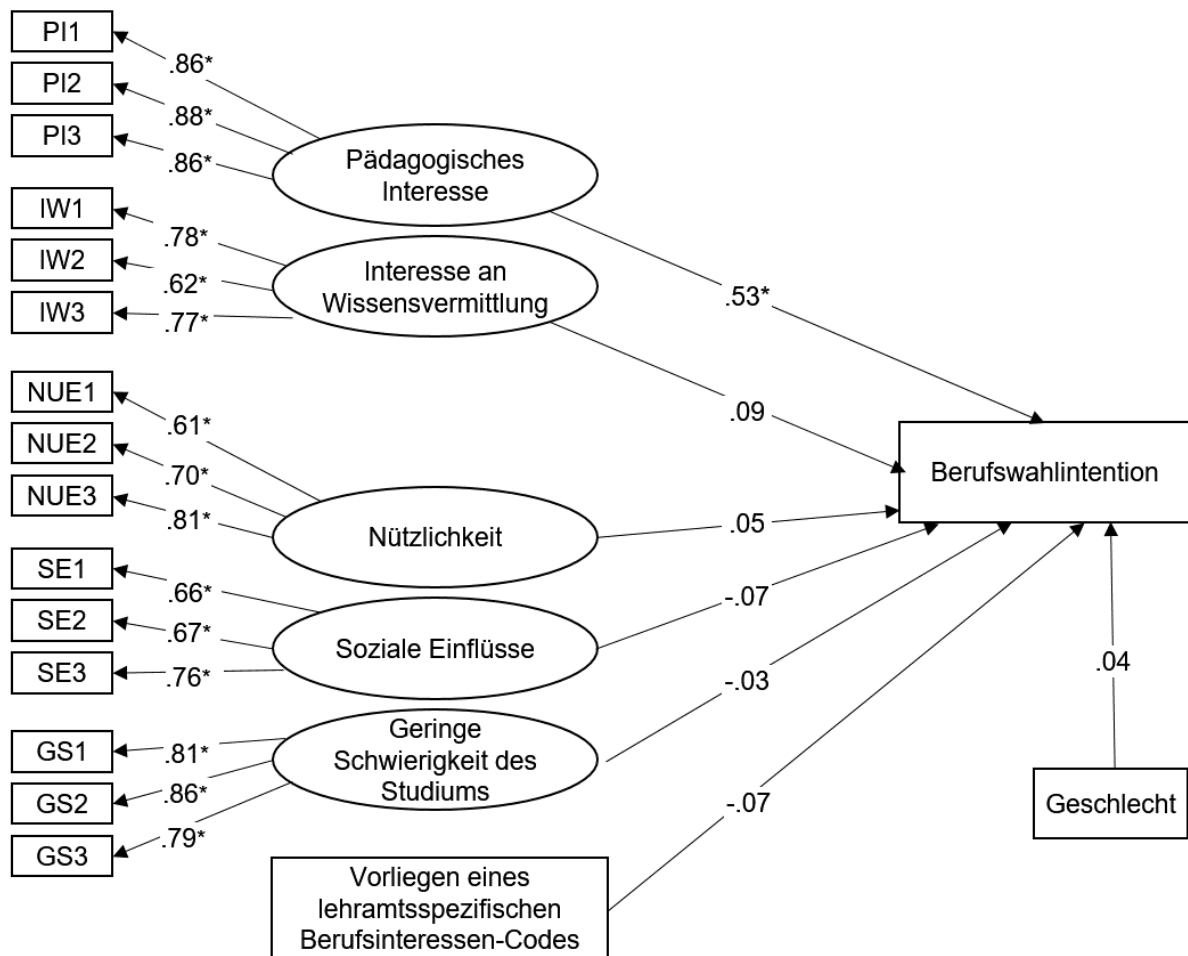

Abbildung 3. Strukturgleichungsmodell zur Vorhersage der durch die Skalen des FEMOLA-S unter Kontrolle des Geschlechts und des Vorliegens eines lehramtsspezifischen Berufsinteressen-Codes nach Holland in Studie 3 ( $\chi^2(144)=190.06$ ; CFI = .99; TLI = .98; RMSEA = .03; SRMR = .03).

Interkorrelationen der Prädiktoren sind aus Gründen der Übersichtlichkeit nicht abgebildet.

Angegeben sind Ladungen,  $\beta$ -Koeffizienten und Korrelationen.  $*p < .05$
